# Supplementary material for: Cis-Effects Condition the Induction of a Major Unfolded Protein Response Factor, ZmbZIP60, in Response to Heat Stress in Maize
Source: Front Plant Sci. 2018 Jun 29;9:833. doi: 10.3389/fpls.2018.00833 (PMC6034121; doi:10.3389/fpls.2018.00833)
Supplement: FIGURE S2 — Ten different sequence motifs representing indels in the promoter region in near upstream region (2200 bp) of ZmbZIP60 in the seven different maize inbred lines. Sequence form six public lines and the inbred line used in this study were used for multiple sequence alignment. [file Image_2.pdf]

**Motif 1**

EP1 accgcccactaaactgccaaggaaacgaggaagcttccttcctctccttcacgccttcctcgc -80  
F7 accgcccactaaactgccaaggaaacgaggaagcttccttcctctccttcacgccttcctcgc -80  
CML52 accgcccactaaactgccaaggaaacgaggaagcttccttcctctccttcacgccttcctcgc -80  
CML247 accgcccactaaactgccaaggaaacgaggaagcttccttcctctccttcacgccttcctcgc -80  
PH207 accgcccactaaactgccaaggaaacgaggaagcttccttcctctccttcacgccttcctcgc -80  
B73 accgcccactaaactgccaaggaaacgaggaagcttccttcctctccttcacgccttcctcgc -80  
B104 accgcccactaaactgccaaggaaacgaggaagcttccttcctctccttcacgccttcctcgc -80  
\*\*\*\*\*

**Motif 2**

EP1 ccgcgcacagcgacagggcagcattccttgccgcagtgagctcaagatccgggtgatctg -175  
F7 ccgcgcacagcgacagggcagcattccttgccgcagtgagctcaagatccgggtgatctg -175  
CML52 ccgcgcacagcgacagggcagcattccttgccgcagtgagctcaagatccgggtgatctg -175  
CML247 ccgcgcacagcgacagggcagcattccttgccgcagtgagctcaagatccgggtgatctg -175  
PH207 ccgcgcacagcgacagggcagcattccttgccgcagtgagctcaagatccgggtgatctg -175  
B73 ccgcgcacaggaacccctgcgacgggca----gcaagcattccttgccggagtgcgctg -175  
B104 ccgcgcacaggaacccctgcgacgggca----gcaagcattccttgccggagtgcgctg -175  
\*\*\*\*\*

**Motif 3**

EP1 gcacgggagtgatcaaatacgtgccatcgcccatcgccgtgcttagaaactgacgggtcgg -270  
F7 gcacgggagtgatcaaatacgtgccatcgcccatcgccgtgcttagaaactgacgggtcgg -270  
CML52 gcacgggagtgatcaaatacgtgccatcgcccatcgccgtgcttagaaactgacgggtcgg -270  
CML247 gcacgggagtgatcaaatacgtgccatcgcccatcgccgtgcttagaaactgacgggtcgg -270  
PH207 gcacgggagtgatcaaatacgtgccatcgcccatcgccgtgcttagaaactgacgggtcgg -270  
B73 gcacgggagtgatcaaatacgtgccatcgcccatcgccgtgcttagaaactgacgggtcgg -266  
B104 gcacgggagtgatcaaatacgtgccatcgcccatcgccgtgcttagaaactgacgggtcgg -266  
\*\*\*\*\*

**Motif 4**

EP1 cttgtcccatatgaattatg-----gttatgcgtgtaggtcgtgctgtgtag -477  
F7 cttgtcccatatgaattatg-----gttatgcgtgtaggtcgtgctgtgtag -477  
CML52 cttgtcccatatgaattatg-----gttatgcgtgtaggtcgtgctgtgtag -477  
CML247 cttgtcccatatgaattatg-----gttatgcgtgtaggtcgtgctgtgtag -477  
PH207 cttgtcccatatgaattatg-----gttatgcgtgtaggtcgtgctgtgtag -477  
B73 cttgatcctcatgaatttaggtactgtgtccgcacattgttcagatcgtgctgtatag -466  
B104 cttgatcctcatgaatttaggtactgtgtccgcacattgttcagatcgtgctgtatag -466  
\*\*\*\*\*

**Motif 5**

EP1 tattgatataaaacttgcattgtatgcaacagtagtttttcgatataacttaatttggtc -535  
F7 tattgatataaaacttgcattgtatgcaacagtagtttttcgatataacttaatttggtc -535  
CML52 tattgatataaaacttgcattgtatgcaacagtagtttttcgatataacttaatttggtc -535  
CML247 tattgatataaaacttgcattgtatgcaacagtagtttttcgatataacttaatttggtc -535  
PH207 tattgatataaaacttgcattgtatgcaacagtagtttttcgatataacttaatttggtc -535  
B73 tattaatataa-----aaacttggattgttacttagtttggtc -536  
B104 tattaatataa-----aaacttggattgttacttagtttggtc -536  
\*\*\*\*\*

**Motif 6**

EP1 gttgttcaagggtgatagacaacttctagttagaacttag-----cgata -638  
F7 gttgttcaagggtgatagacaacttctagttagaacttag-----cgata -638  
CML52 gttgttcaagggtgatagacaacttctagttagaacttag-----cgata -638  
CML247 gttgttcaagggtgatagacaacttctagttagaacttag-----cgata -638  
PH207 gttgttcaagggtgatagacaacttctagttagaacttag-----cgata -638  
B73 accgttcaaggagatagacattcgataggtacgtacaacttctagctagaatttaggc -623  
B104 accgttcaaggagatagacattcgataggtacgtacaacttctagctagaatttaggc -623  
\*\*\*\*\*

**Motif 7**

EP1 atgtttgtttcttttgtttatatttttttaact-----cgatcatatattgatata -585  
F7 atgtttgtttcttttgtttatatttttttaact-----cgatcatatattgatata -585  
CML52 atgtttgtttcttttgtttatatttttttaact-----cgatcatatattgatata -585  
CML247 atgtttgtttcttttgtttatatttttttaact-----cgatcatatattgatata -585  
PH207 atgtttgtttcttttgtttatatttttttaact-----cgatcatatattgatata -585  
B73 atgtttgtttcttttgtttatatttttttaacttgtatcgagctattaatata -563  
B104 atgtttgtttcttttgtttatatttttttaacttgtatcgagctattaatata -563  
\*\*\*\*\*

**Motif 8**

EP1 ctgaatgtgaggcttgaccggtt-----gatataggggaggcacaagggtggc -1134  
F7 ctgaatgtgaggcttgaccggtt-----gatataggggaggcacaagggtggc -1134  
CML52 ctgaatgtgaggcttgaccggtt-----gatataggggaggcacaagggtggc -1133  
CML247 ctgaatgtgaggcttgaccggtt-----gatataggggaggcacaagggtggc -1133  
PH207 ctgaatgtgaggcttgaccggtt-----gatataggggaggcacaagggtggc -1133  
B73 ctgaatgtgaggcttgaccggttgcacgcagtgccggatc -1133  
B104 ctgaatgtgaggcttgaccggttgcacgcagtgccggatc -1133  
\*\*\*\*\*

**Motif 9**

EP1 tggttggtttcaatcgacgatac--cttcatatgaattataggagctctgtatgatttgta -1446  
F7 tggttggtttcaatcgacgatac--cttcatatgaattataggagctctgtatgatttgta -1446  
CML52 tggttggtttcaatcgacgatac--cttcatatgaattataggagctctgtatgatttgta -1445  
CML247 tggttggtttcaatcgacgatac--cttcatatgaattataggagctctgtatgatttgta -1445  
PH207 tggttggtttcaatcgacgatac--cttcatatgaattataggagctctgtatgatttgta -1445  
B73 tggttggtttcaatcgatggtacccctcatacaaattacagggtctctgtatgatttgta -1460  
B104 tggttggtttcaatcgatggtacccctcatacaaattacagggtctctgtatgatttgta -1460  
\*\*\*\*\*

**Motif 10**

EP1 gataggtcacttggcaca-----tagagctcctggagaacccagatcctgc -1700  
F7 gataggtcacttggcaca-----tagagctcctggagaacccagatcctgc -1700  
CML52 gataggtcacttggcaca-----tagagctcctggagaacccagatcctgc -1699  
CML247 gataggtcacttggcaca-----tagagctcctggagaacccagatcctgc -1699  
PH207 gataggtcacttggcaca-----tagagctcctggagaacccagatcctgc -1699  
B73 gataggtcactagaccgtccgcgatggcacatagagctctagaaagaacctagaccocgc -1712  
B104 gataggtcactagaccgtccgcgatggcacatagagctctagaaagaacctagaccocgc -1712  
\*\*\*\*\*

Figure S2
