# Supplementary material for: Cis-Effects Condition the Induction of a Major Unfolded Protein Response Factor, ZmbZIP60, in Response to Heat Stress in Maize
Source: PubMed Central journal article supplement (PMC6034121; doi:10.3389/fpls.2018.00833), 2018-06-29
Supplement: Image_3.pdf [file Image_3.pdf]

**One-way ANOVA analysis and multiple comparisons by using Tukey test of Figure 5C and 5D**

**Figure 5C**

|           | Df | Sum Sq   | Mean Sq   | F value | Pr(>F)       |
|-----------|----|----------|-----------|---------|--------------|
| Groups    | 2  | 3.17E+08 | 158555825 | 12.68   | 1.35e-05 *** |
| Residuals | 93 | 1.16E+09 | 12502743  |         |              |

Signif. codes: 0 '\*\*\*' 0.001 '\*\*' 0.01 '\*' 0.05 '.' 0.1 ' ' 1

| comparison        | P value adjust |
|-------------------|----------------|
| CML type-B73 type | 0.0002496      |
| other-B73 type    | 0.7136741      |
| CML-Other         | 0.0006506      |

**Figure 5D**

|           | Df | Sum Sq   | Mean Sq   | F value | Pr(>F)       |
|-----------|----|----------|-----------|---------|--------------|
| Groups    | 3  | 4.39E+08 | 146429067 | 12.95   | 3.97e-07 *** |
| Residuals | 92 | 1.04E+09 | 11310648  |         |              |

Signif. codes: 0 '\*\*\*' 0.001 '\*\*' 0.01 '\*' 0.05 '.' 0.1 ' ' 1

| comparison        | P value adjust |
|-------------------|----------------|
| CML type-B73 type | 0.0000017      |
| Other-B73 type    | 0.0092124      |
| B73 ike-B73 type  | 0.9681291      |
| Other-CML type    | 0.904658       |
| B73-like-CML type | 0.0024962      |
| B73-like-Other    | 0.0404958      |

**Correlation analysis of the CACTA-TE/Motif 5, Motif 4 and the interaction of all to the ZmbZIP60 expression levels by using linear model**

ZmbZIP60 expression levels~(CACTA-TE/motif 5+motif 4+CACTA-TE/motif 5\*motif 4)

Coefficients:

|                  | Estimate | Std. Error | t value | Pr(> t )     |
|------------------|----------|------------|---------|--------------|
| (Intercept)      | -6021.7  | 3122.2     | -1.929  | 0.05685      |
| CACTA-TE/motif 5 | 3230.1   | 1227.9     | 2.631   | 0.00999 **   |
| motif 4          | 11314.2  | 2234.1     | 5.064   | 2.10E-06 *** |
| Interaction      | -3510.8  | 749.1      | -4.687  | 9.58E-06 *** |

Signif. codes: 0 '\*\*\*' 0.001 '\*\*' 0.01 '\*' 0.05 '.' 0.1 ' ' 1

Figure S3
